# Supplementary material
Source: publisher figshare collection journal article supplement (https://tandf.figshare.com/ndownloader/files/15456794)
Supplement: Supplementary file 1 [file 15456794]

# ***Effect of orientation of extra fused benzene ring and lateral methyl substituent on the mesophase behavior of three-ring azo/ester molecules***

Ahmed M. Sultan, Abdelgawad A. Fahmi*, Gamal R. Saad, Magdi M. Naoum*

Chemistry Department, Faculty of Science, Cairo University, Giza, Egypt

* Corresponding authors: Email: [magdinaoum@yahoo.co.uk](mailto:magdinaoum@yahoo.co.uk) (Magdi M. Naoum) and [abdelgawad5@hotmail.com](mailto:abdelgawad5@hotmail.com) (Abdelgawad A. Fahmi)

FT-IR, 1H-NMR and elemental analyses of some representative examples, are given below:

For **I***8*a, 2-naphthyl 4'-(4''-octyloxy phenylazo) benzoate, Yield (88%). FT-IR (KBr, υmax cm−1): 3055, 2920, 2851, 1724, 1601, 1501, 1261. 1H NMR (CDCl3, 500 MHz): (δ in ppm): 8.43 (d, 2H), 7.99-7.84 (m, 7H), 7.73 (d, 1H), 7.540-7.48 (m, 2H), 7.38 (d, 1H), 7.02 (d, 2H), 4.07 (t, 2H), 1.86-1.81 (qnt., 2H), 1.53-1.33 (m, 8H, CH2), 0.88 (t, 3H). Elemental analysis: calc. C 77.47%, H 6.71%, N 5.83%; found C 77.62%, H 6.54%, N 5.68%.

For **II***8*a, 1-naphthyl 4'-(4''-octyloxy phenylazo) benzoate, Yield (86%). FT-IR (KBr, cm−1): 3063, 2924, 2853, 1736, 1601, 1501, 1258. 1H NMR (CDCl3, 400 MHz): (δ in ppm): 8.43 (d, 2H), 8.02-7.88 (m, 6H), 7.77 (d, 1H), 7.53-7.49 (m, 3H), 7.38 (d, 1H), 7.01 (d, 2H), 4.05 (t, 2H), 1.85-1.78 (qnt., 2H), 1.49-1.31 (m, 8H, CH2), 0.89 (t, 3H). Elemental analysis: calc. C 77.47%, H 6.71%, N 5.83%; found C 77.32%, H 6.86%, N 5.98%.

For **I***8*b, 2-naphthyl 4'-(2''-methyl-4''-octyloxy phenylazo) benzoate, Yield (86%). FT-IR (KBr, cm−1): 3059, 2920, 2851, 1728, 1597, 1501, 1242. 1H NMR (CDCl3, 400 MHz): (δ in ppm): 8.36 (d, 2H), 7.99 (d, 2H), 7.93-7.81 (m, 4H), 7.72 (d, 1H), 7.54-7.47 (m, 2H), 7.40-7.38 (dd, 1H), 6.85 (d, 1H), 6.80 (dd, 1H), 4.04 (t, 2H), 2.76 (s, 3H) 1.85-1.78 (qnt., 2H), 1.50-1.30 (m, 8H, CH2), 0.92 (t, 3H). Elemental analysis: calc. C 77.70%, H 6.93%, N 5.66%; found C 77.57%, H 7.06%, N 5.53%.

For **II***16*b, 2-naphthyl 4'-(2''-methyl-4''-hexadecyloxy phenylazo) benzoate, Yield (58%). FT-IR (KBr, cm−1): 3059, 2916, 2851, 1732, 1604, 1496, 1246. 1H NMR (CDCl3, 400 MHz): (δ in ppm): 8.46 (d, 2H), 8.01 (d, 2H), 7.98-7.90 (m, 2H), 7.79 (d, 2H), 7.55-7.51 (m, 3H), 7.42 (d, 1H), 6.86 (s, 1H), 6.81(d, 1H), 4.04 (t, 2H), 2.77 (s, 3H) 1.86-1.79 (qnt., 2H), 1.52-1.26 (m, 24H, CH2), 0.89 (t, 3H). Elemental analysis: calc. C 79.17%, H 8.31%, N 4.62%; found C 79.01%, H 8.15%, N 4.78%.

For **I***8*c, 2-naphthyl 4'-(3''-methyl-4''-hexadecyloxy phenylazo) benzoate, Yield (81%). FT-IR (KBr, cm−1): 3055, 2924, 2855, 1730, 1601, 1497, 1261. 1H NMR (CDCl3, 400 MHz): (δ in ppm): 8.35 (d, 2H), 7.97 (d, 2H), 7.90-7.80 (m, 5H), 7.69 (s, 1H), 7.49-7.46 (m, 2H), 7.37-7.34 (d, 1H), 6.91(d, 1H), 4.04 (t, 2H), 2.28 (s, 3H) 1.86-1.79 (qnt., 2H), 1.51-1.31 (m, 8H, CH2), 0.87 (t, 3H). Elemental analysis: calc. C 77.70%, H 6.93%, N 5.66%; found C 77.86%, H 6.77%, N 5.80%.

For **II***12*c, 2-naphthyl 4'-(3''-methyl-4''-dodecyloxy phenylazo) benzoate, (**II***12c*): Yield (71%). FT-IR (KBr, cm−1): 3055, 2920, 2851, 1732, 1597, 1496, 1253. 1H NMR (CDCl3, 400 MHz): (δ in ppm): 8.44 (d, 2H), 8.01 (d, 2H), 7.97-7.84 (m, 4H), 7.79 (d, 1H), 7.55-7.50 (m, 3H), 7.39 (d, 1H), 6.94 (d, 1H), 4.08 (t, 2H), 2.32 (s, 3H) 1.86-1.82 (qnt., 2H), 1.54-1.24 (m, 16H, CH2), 0.88 (t, 3H). Elemental analysis: calc. C 78.51%, H 7.69%, N 5.09%; found C 78.38%, H 7.56%, N 5.22%.
